# Supplementary material for: Small-molecule inhibition of Lats kinases may promote Yap-dependent proliferation in postmitotic mammalian tissues
Source: PubMed Central journal article supplement (PMC8149661; doi:10.1038/s41467-021-23395-3), 2021-05-25
Supplement: 41467_2021_23395_MOESM1_ESM.pdf [file 41467_2021_23395_MOESM1_ESM.pdf]

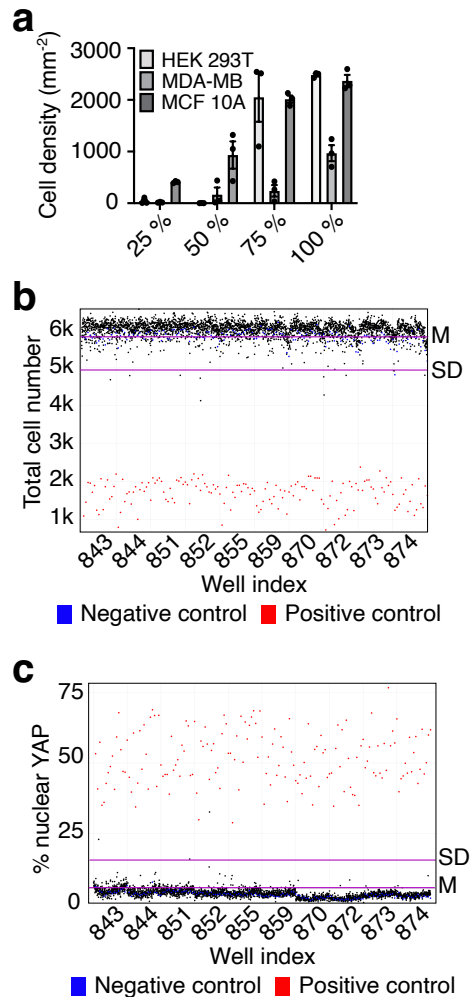

**Supplementary Figure 1. Screening for activators of Yap translocation into nuclei. Related to Figure 1.** (a) The adherent properties of three human epithelial-cell lines—one embryonic kidney line (HEK 293T) and two mammary-gland lines (MDA-MB and MCF 10A)—were tested. Only MCF 10A cells display a reproducible correlation between the number of cells seeded and the number of cells adhered after 24 hr ( $n = 3$  for each condition, mean  $\pm$  SEM). (b) In a representative example of cell survival in ten 384-well plates screened in the assay for nuclear translocation of Yap, the plate indexes are indicated on the x-axis and the total number of cells detected in each well of each plate is indicated on the y-axis. Purple lines demonstrate the average mean (M) and one standard deviation (SD) below the mean of the number of cells detected in each negative control well (blue dots) of each of the ten plates screened. Red dots represent sub-confluent positive control wells; black dots represent each well treated with a compound. The substances that decreased the number of cells over one SD were eliminated owing to toxicity. (c) In the same ten 384-well plates analyzed in panel B, the percentage of cells with nuclear Yap was determined using MetaXpress software. Only one in a thousand compounds increased this value more than one standard deviation (SD; purple line) above the mean value determined for the negative controls (M; purple line).

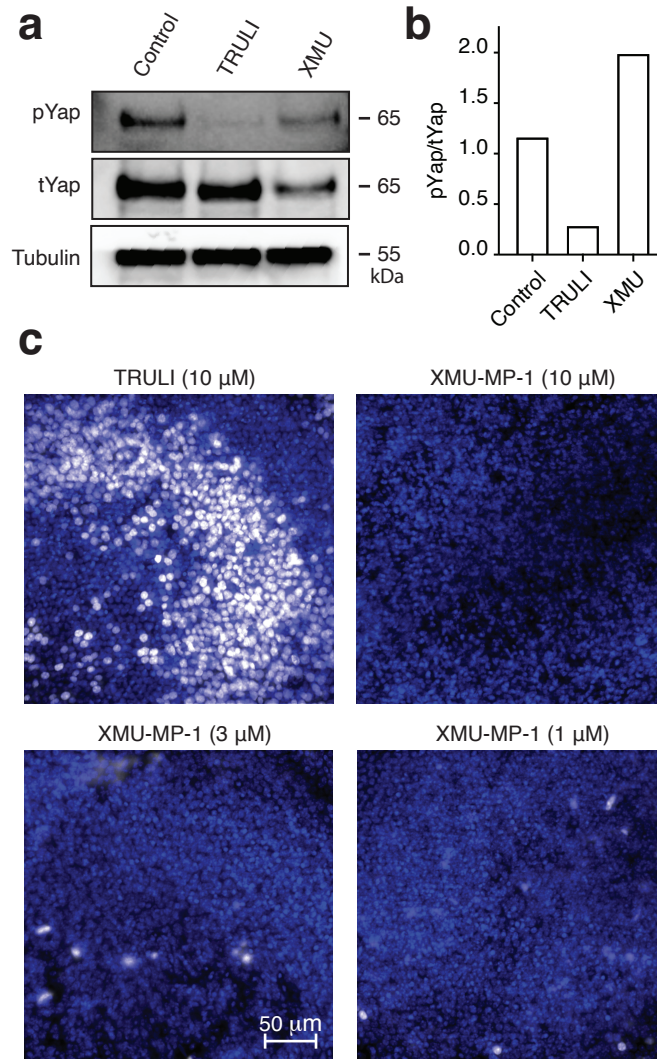

**Supplementary Figure 2. Lack of Yap activation by the Mst inhibitor XMU-MP-1. Related to Figure 2.** (A) Six utricles per condition were treated for 24 hr with 10  $\mu$ M TRULI or XMU-MP-1 to assess effects on the amount of phospho-Yap by comparison to control conditions. (B) Quantification of band-intensity ratios for phospho-Yap and total Yap in the immunoblot of panel A shows that XMU-MP-1 does not reduce the fraction of phosphorylated Yap. (C) When adult mouse utricles were explanted and cultured with EdU (white) and either TRULI or varying concentrations of XMU-MP-1, the latter caused no increase in proliferation. Nuclei are stained with DAPI (blue). This assay was repeated at least twice with the same results.

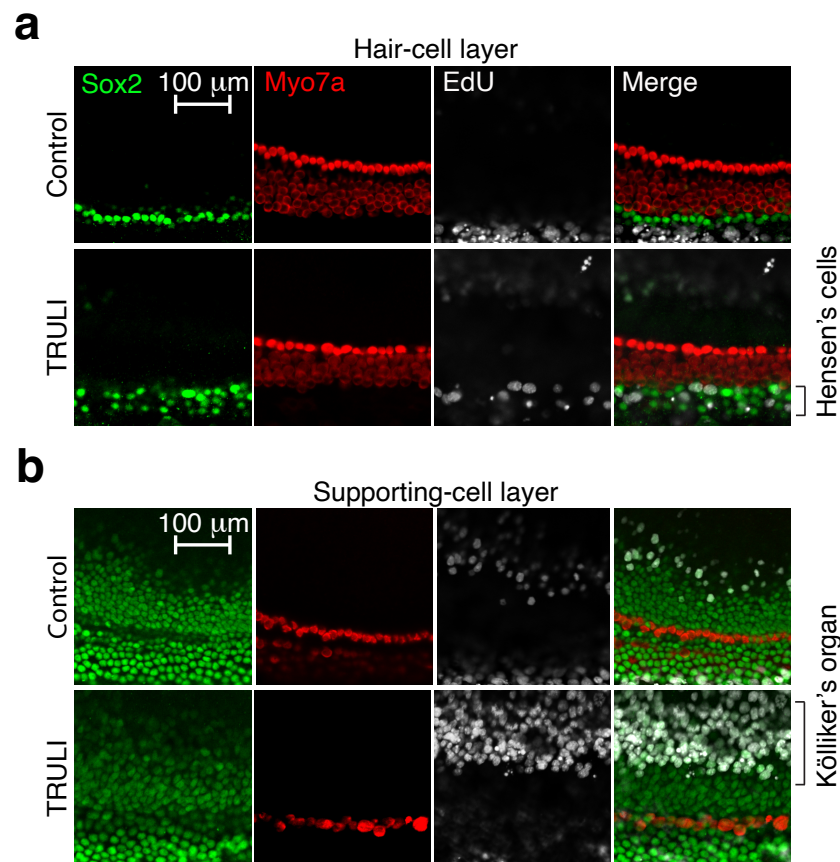

**Supplementary Figure 3. Proliferative response in the cochlea after treatment with TRULI. Related to Figure 2.** (a) No hair-cell loss is observed after 5 d of treatment of the P1 organ with 10  $\mu$ M TRULI ( $n = 6$ ). Only the most lateral rows of Hensen's cells re-enter the cell cycle after the treatment. (b) TRULI elicits robust proliferation of Sox2-positive cells in Kölliker's organ, as measured by the incorporation of EdU. This assay was repeated three times on two explants each time with the same results.

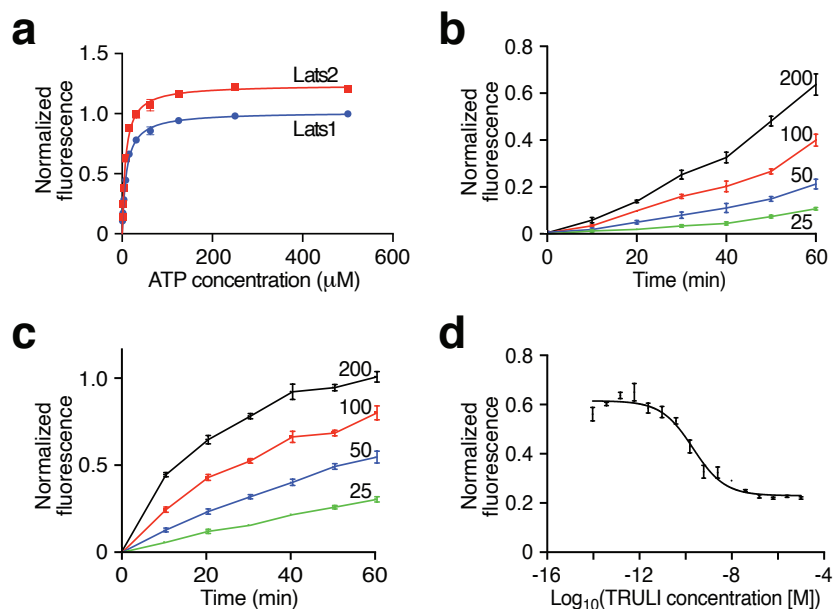

**Supplementary Figure 4. Optimization and further results of *in vitro* kinase assay. Related to Figure 3.** (A) In order to perform assays at an appropriate ATP concentration, we established the Michaelis-Menten constants for Lats1 ( $K_m = 9.4 \mu\text{M}$ ) and Lats2 ( $K_m = 7.6 \mu\text{M}$ ). (B) A kinetic assay for Lats1 was used to determine the optimal signal-to-noise ratio within the linear range of product formation. Enzyme concentrations are indicated in micrograms per liter. (C) The corresponding assay was performed for Lats2. (D) The half-maximal inhibitory concentration of TRULI against Lats2 was  $IC_{50} = 0.2 \text{ nM}$ .

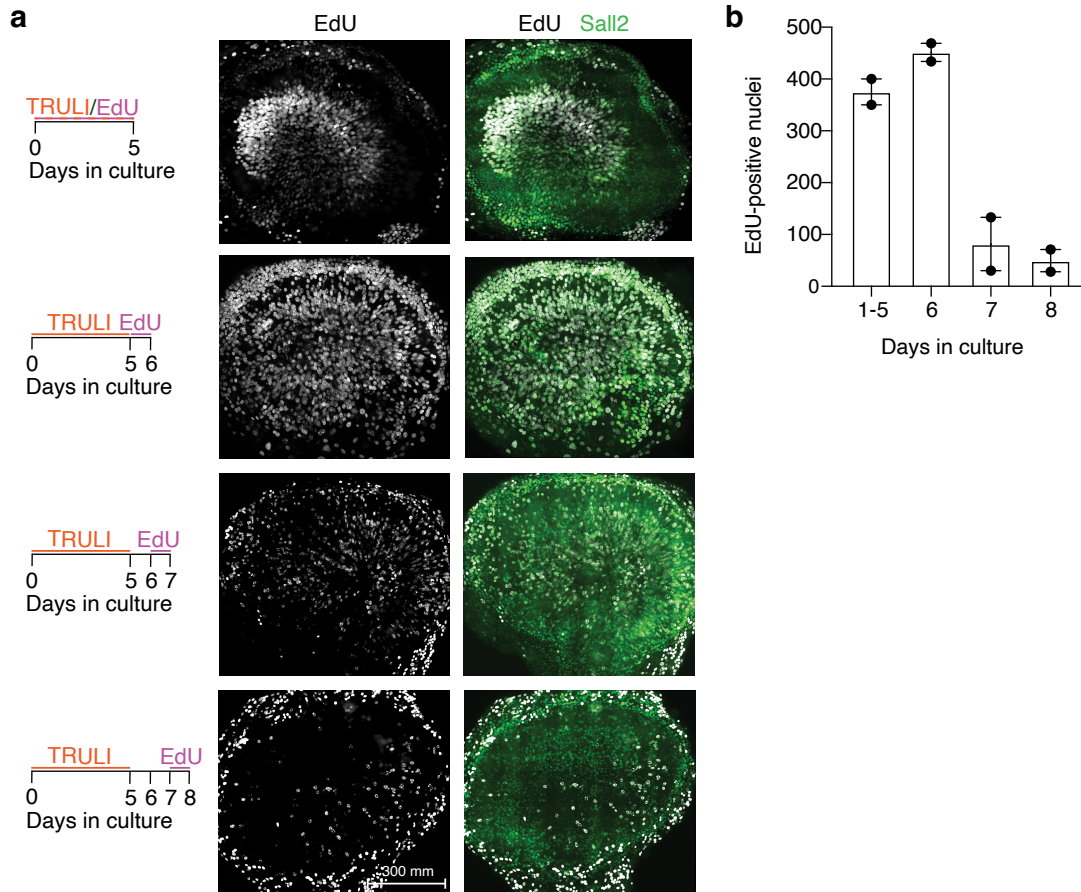

**Supplementary Figure 5. Cell-cycle exit after TRULI withdrawal. Related to Figure 4.**

(A) As shown in the timelines to the left, utricles were explanted and cultured for 5 d in the presence of TRULI; EdU was then added at various times. In first top row, when EdU was present throughout the 5 d period of culture, extensive proliferation occurred in the striolar region. The second row shows that proliferation was still heavier when EdU was presented during the day following TRULI exposure. The third row indicates that proliferation declined during the second day after TRULI withdrawal. The fourth row demonstrates that proliferation fell to nearly the background level when EdU was provided three days after the withdrawal of TRULI. (B) A bar graph quantifies the number of EdU-positive nuclei per sensory epithelium in the foregoing experiments. Each datum is an average from two utricles.

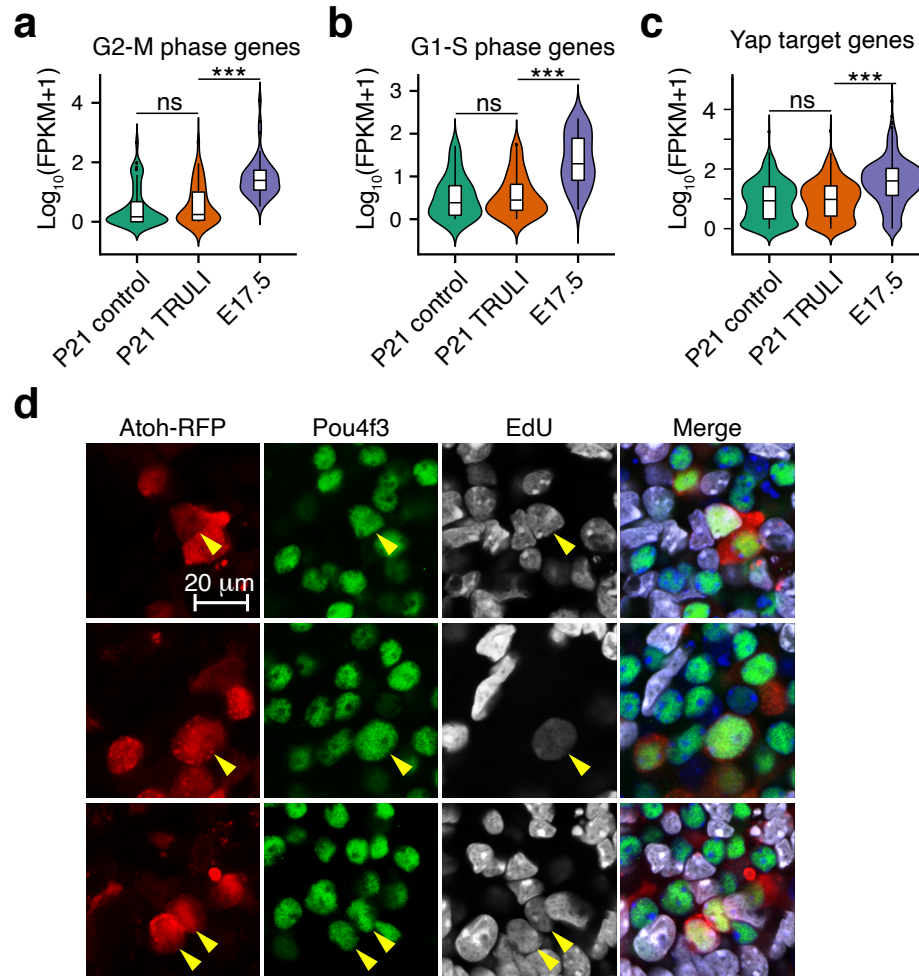

**Supplementary Figure 6. Cell-cycle exit and hair cell differentiation after TRULI withdrawal. Related to Figure 5.** (A) RNA-sequencing analysis demonstrates that the genes active in G2-M are downregulated to the control levels in P21 supporting cells 5 d after TRULI withdrawal similarly downregulated to the DMSO-control levels ( $p = 0.2908$  by a Wilcoxon rank sum test with continuity correction,  $n = 52$  genes for each condition) and are significantly lower than that found in E17.5 supporting cells ( $p = 3.443 \cdot 10^{-9}$  by a two-sided Wilcoxon rank sum test with continuity correction,  $n = 52$  genes for each condition). Box plots indicate median (middle line), 25<sup>th</sup> and 75<sup>th</sup> percentile (box) and 5<sup>th</sup> and 95<sup>th</sup> percentile (whiskers) as well as outliers (single points). (B) S-phase genes are similarly downregulated to the DMSO-control levels ( $p = 0.7036$  by a two-sided Wilcoxon rank sum test with continuity correction,  $n = 42$  genes for each condition) and are significantly lower than that found in E17.5 supporting cells ( $p = 1.526 \cdot 10^{-8}$  by a Wilcoxon rank sum test with continuity correction,  $n = 42$  genes for each condition). Box plots indicate median (middle line), 25<sup>th</sup> and 75<sup>th</sup> percentile (box) and 5<sup>th</sup> and 95<sup>th</sup> percentile (whiskers) as well as outliers (single points). (C) Genes known to be targets of the Yap-Tead complex are also downregulated to the DMSO-control levels ( $p = 0.3447$  by a Wilcoxon rank sum test with continuity correction,  $n = 337$  genes for each condition) and are significantly lower than that found in E17.5 supporting cells ( $p = 2.2 \cdot 10^{-16}$  by a Wilcoxon rank sum test with continuity correction,  $n = 337$  genes for

each condition). Box plots indicate median (middle line), 25<sup>th</sup> and 75<sup>th</sup> percentile (box) and 5<sup>th</sup> and 95<sup>th</sup> percentile (whiskers) as well as outliers (single points). (D) To assess whether new hair cells can be formed after TRULI treatment, P21 utricles that had been treated with TRULI for 5 d were cultured for two days to allow cell-cycle exit, then transfected with adenovirus carrying Atoh1. The cultures were co-treated with EdU to permit lineage tracing of supporting cells that had undergone cell division in the presence of TRULI. After 5 d of Atoh1 expression, many EdU-positive supporting cells displayed high levels of Pou4f3 protein, demonstrating the potential of supporting cells to transdifferentiate. The experiment was repeated 3 times (n = 2 utricles each time) with similar results.

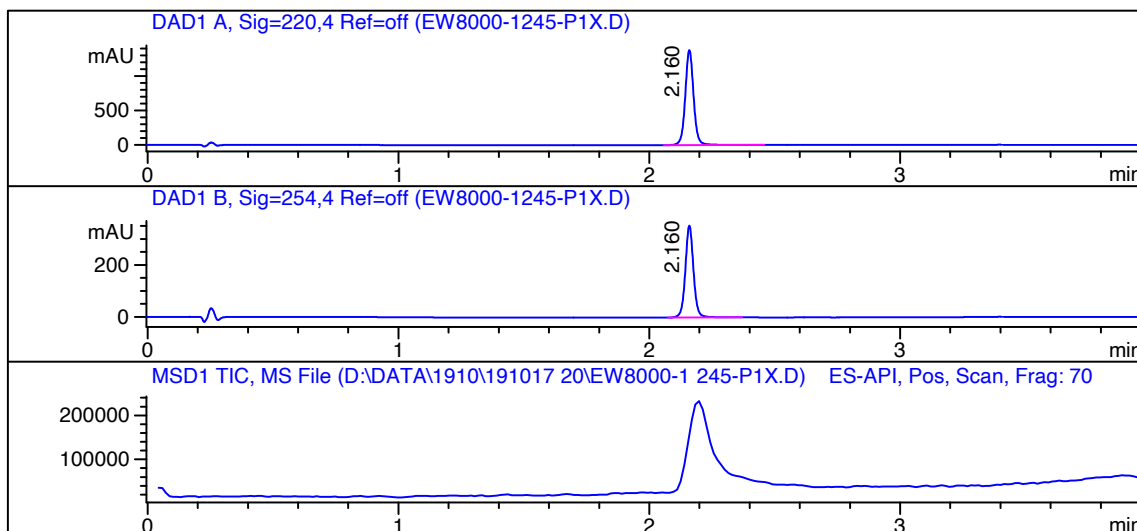

**Supplementary Figure 7. Liquid chromatography–mass spectrometry (LC–MS) of TRULI.**  
**MS (m/z):**  $[M]^+$  calculated for  $C_{18}H_{14}N_4OS$ , 334.09; found, 335.1  $[M + H]^+$ .



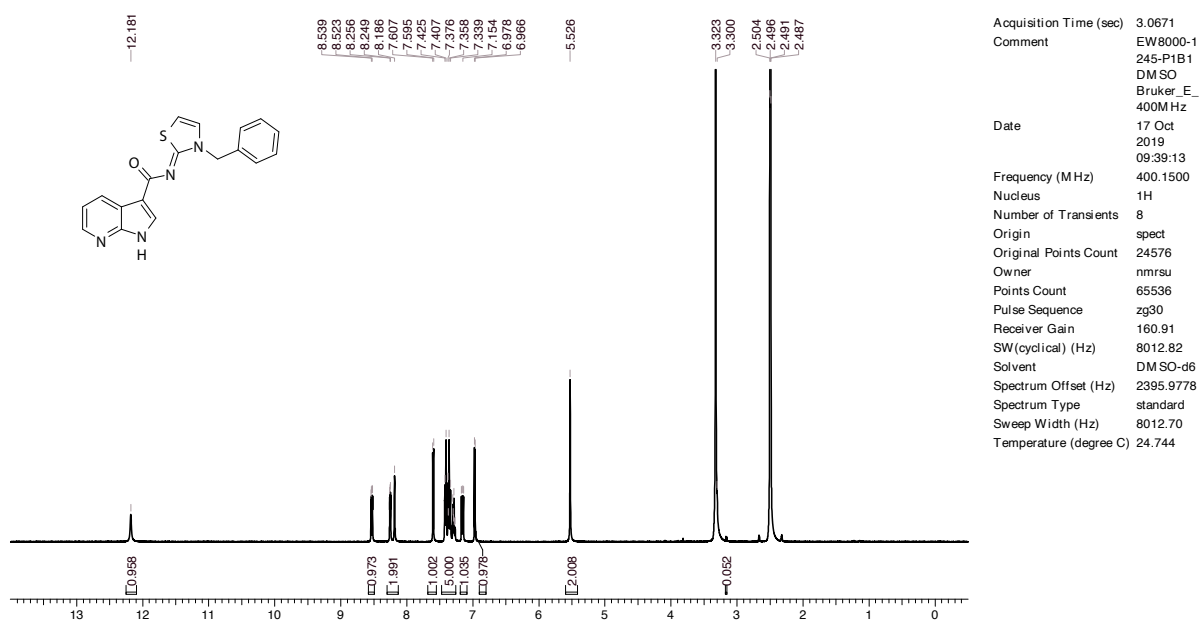

**Supplementary Figure 8. Nuclear magnetic resonance (NMR) of TRULI.**  $^1\text{H}$  NMR (DMSO, 400 MHz):  $\delta$  12.18 (br. s, 1H), 8.53-8.50(m, 1H), 8.25-8.10 (m, 2H), 7.60 (d,  $J = 4.8$  Hz, 1H), 7.42 - 7.40 (m, 5H), 7.36 (d,  $J = 7.2$  Hz, 1H), 6.96 (d,  $J = 4.8$  Hz, 1H), 5.52 (s, 2H).

**Supplementary Table 1. Alignment of residues at the ATP-binding sites of AGC kinases. Related to Figure 3.** These 36 residues define the ATP-binding pockets of 62 kinases, but do not represent continuous sequences.

|         |                                        |
|---------|----------------------------------------|
| LATS1   | LGIGAFGEVAKVRLFVMDYIPGGDMMSDKDNLDFG    |
| LATS2   | LGIGAFGEVAKVKLFVMDYIPGGDMMSDKDNLDFG    |
| NDR1    | IGRGAFGEVAKVKMLIMEFLPGGDMMTDKDNLSDFG   |
| NDR2    | IGRGAFGEVAKVKMLIMEFLPGGDMMTDKDNLSDFG   |
| ROCK1   | IGRGAFGEVAKVQLMVMMEYMPGGDLVNDKDNLADFG  |
| ROCK2   | IGRGAFGEVAKVQLMVMMEYMPGGDLVNDKDNLADFG  |
| RSKL2   | VQDPATGGTMKSSGPHLNLLTPARLPSDHGNLTYFG   |
| SgK494  | VAKGSFGTVAKHSLIMCSYCTDLYSLDKENLDFG     |
| PDK1    | LGEFSFSTVAKVKLFGLSYAKNGELLKDKENLDFG    |
| RSK4    | LGQGSFGKVAKVKLLILDFLRGGDVFTDKENLDFG    |
| RSK1    | LGQGSYGVAKVKLLILDFLRGGDLFTDKENLDFG     |
| RSK3    | LGQGSFGKVAKVKLLILDFLRGGDLFTDKENLDFG    |
| RSK2    | LGQGSFGKVAKVKLLILDFLRGGDLFTDKENLDFG    |
| p70S6K  | LKGGYGKVAKVDLLILEYLSGGELFMDKENMTDFG    |
| p70S6Kb | LKGGYGKVAKVELLILECLSGGELFTDKENMTDFG    |
| MSK1    | LGTGAYGKVAKVTLILLIDYINGGELFTDKENLDFG   |
| MSK2    | LGTGAYGKVAKVTLILLIDYVSGGEMFTDKENLDFG   |
| YANK2   | IGKGSFGKVAKVNLVVDDLLGGDLRYDKDNLDFN     |
| YANK3   | IGKGSFGKVAKVNLVVDDLLGGDLRYDKDNLDFN     |
| YANK1   | IGKGSFGKVAKVNLVVDDLLGGDLRYDKDNLDFN     |
| PKCi    | IGRGSYAKVAKVGLFVIEYVNGGDLMFDDKDNLDYD   |
| PKCz    | IGRGSYAKVAKVGLLVIEYVNGGDLMFDDKDNLDYD   |
| SGK2    | IGKGNYGKVAKVGLFVLDYVNGGELFFDKENLDFG    |
| SGK     | IGKGSFGKVAKVGLFVLDYINGGELFYDKENLDFG    |
| SGK3    | IGKGSFGKVAKVGLFVLDYVNGGELFFDKENLDFG    |
| PKN3    | LGRGHFGKVAKLSLFFVTEFVPPGGDLMMDKDNLADFG |
| PKN2    | LGRGHFGKVAKVNLVMEYAAGGDLMMDKDNLADFG    |
| PKN1    | LGRGHFGKVAKVNLVMEYSAGGDLMLDKDNLADFG    |
| AKT1    | LKGTFGKVAKTALFVMEYANGGELFFDKENMTDFG    |
| AKT2    | LKGTFGKVAKTALFVMEYANGGELFFDKENMTDFG    |
| AKT3    | LKGTFGKVAKTSLFVMEYVNGGELFFDKENMTDFG    |
| PKCt    | LKGSFGKVAKTHMFVMEYLNGGDLMYDKDNLADFG    |
| PKCd    | LKGSFGKVAKTHLFVMEFLNGGDLMYDKDNLADFG    |
| PKCe    | LKGSFGKVAKTQLFVMEYVNGGDLMFDDKDNLADFG   |
| PKCh    | LKGSFGKVAKTQLFVMEFVNGGDLMFDDKDNLADFG   |
| PKCg    | LKGSFGKVAKTQLFVMEYVTGGDLMYDKDNMTDFG    |
| PKCb    | LKGSFGKVAKTQLFVMEYVNGGDLMYDKDNMADFG    |
| PKCa    | LKGSFGKVAKTQLFVMEYVNGGDLMYDKDNMADFG    |
| BARK2   | IGRGGFGEVAKVCMFILDLMNGGDLHYDKANLSDLG   |
| BARK1   | IGRGGFGEVAKVCMFILDLMNGGDLHYDKANLSDLG   |
| RHOK    | LKGGFGEVAKVSLLVMTIMNGGDIRYDKENLSDLG    |
| GPRK7   | LKGGFGEVAKVSLVMSLMNGGDLKFDKENLSDLG     |
| GPRK6   | LKGGFGEVAKVSLLVLTLMNGGDLKFDKENLSDLG    |

|       |                                      |
|-------|--------------------------------------|
| GPRK5 | LGKGGFGEVAKVNLLVLTIMNGGDLKFDKENLSDLG |
| GPRK4 | LGKGGFGEVAKVSLLVLTIMNGGDLKFDKENLSDLG |
| MAST3 | ISNGAYGAVAKVSMVMMEYVEGGDCATDKDNLTDFG |
| MAST4 | ISNGAYGAVAKVSMVMMEYVEGGDCATDKDNLTDFG |
| MAST2 | ISNGAYGAVAKVSMVMMEYVEGGDCATDKDNLTDFG |
| MAST1 | ISNGAYGAVAKVSMVMMEYVEGGDCATDKDNLTDFG |
| CRK   | VGCGHFAEVAKPQLLVMEYQPGGDLSDKENLVDFG  |
| MASTL | ISRGAFGKVAKVHLLVMEYLIGGDVKSDDKNLTDFG |
| DMPK1 | IGRGAFSEVAKTQLLVMEYYVGGDLTDDKNLADFG  |
| MRCKb | IGRGAFGEVAKTALLVMDYYVGGDLTDDKNLADFG  |
| DMPK2 | IGRGAFGEVAKTLLVMDYYAGGDLTDDKNLADFG   |
| MRCKa | IGRGAFGEVAKTLLVMDYYVGGDLTDDKNLADFG   |
| PKG2  | LGVGGFGRVAKVKMLLEACLGGELWSDKENIVDFG  |
| PKG1  | LGVGGFGRVAKVRLMLMEACLGGELWTDKENIVDFG |
| PRKX  | VGTGTFGRVAKIRLMLMEYVPGGELFSDKENLTDFG |
| PRKY  | MGTGTFGRVAKIRLMLMEYVPGGELFSDKENLTDFG |
| PKACg | LGMGSFGRVAKVLLVMEYVPGGEMFSDKENLTDFG  |
| PKACb | LGTGSFGRVAKVRLVMEYVPGGEMFSDKENLTDFG  |
| PKACa | LGTGSFGRVAKVLMVMEYVPGGEMFSDKENLTDFG  |

**Supplementary Table 2. Percentage sequence identity for the 36 residues of the ATP-binding site between Lats1 and Lats2 and AGC kinases. Related to Figure 3.** In this and the subsequent two tables, colors identify different sub-families of the AGC kinase family. Green- PKA family members, Orange- PKC family members, Blue- NDR family members, Yellow- ROCK family members

| <b>AGC kinase</b> | <b>Identity to Lats1 (%)</b> | <b>Identity to Lats2 (%)</b> |
|-------------------|------------------------------|------------------------------|
| LATS1             | 100.0                        | 97.2                         |
| LATS2             | 97.2                         | 100.0                        |
| PKACb             | 75.0                         | 72.2                         |
| PKN2              | 72.2                         | 72.2                         |
| PKN1              | 72.2                         | 72.2                         |
| ROCK1             | 72.2                         | 72.2                         |
| ROCK2             | 72.2                         | 72.2                         |
| PKACg             | 72.2                         | 75.0                         |
| PKACa             | 72.2                         | 75.0                         |
| PKCe              | 69.4                         | 69.4                         |
| PKCg              | 69.4                         | 69.4                         |
| NDR1              | 69.4                         | 72.2                         |
| NDR2              | 69.4                         | 72.2                         |
| MASTL             | 69.4                         | 69.4                         |
| MRCKb             | 69.4                         | 69.4                         |
| DMPK2             | 69.4                         | 69.4                         |
| MRCKa             | 69.4                         | 69.4                         |
| SGK               | 66.7                         | 66.7                         |
| PKN3              | 66.7                         | 66.7                         |
| PKCt              | 66.7                         | 66.7                         |
| PKCd              | 66.7                         | 66.7                         |
| PKCh              | 66.7                         | 66.7                         |
| PKCb              | 66.7                         | 66.7                         |
| PKCa              | 66.7                         | 66.7                         |
| MSK1              | 63.9                         | 63.9                         |
| MSK2              | 63.9                         | 63.9                         |
| CRIK              | 63.9                         | 63.9                         |
| DMPK1             | 63.9                         | 63.9                         |
| PRKX              | 63.9                         | 61.1                         |
| PRKY              | 63.9                         | 61.1                         |

|         |      |      |
|---------|------|------|
| RSK4    | 61.1 | 63.9 |
| RSK3    | 61.1 | 63.9 |
| RSK2    | 61.1 | 63.9 |
| YANK2   | 61.1 | 61.1 |
| YANK3   | 61.1 | 61.1 |
| YANK1   | 61.1 | 61.1 |
| PKCi    | 61.1 | 61.1 |
| SGK2    | 61.1 | 61.1 |
| SGK3    | 61.1 | 61.1 |
| AKT1    | 61.1 | 61.1 |
| AKT2    | 61.1 | 61.1 |
| AKT3    | 61.1 | 61.1 |
| RHOK    | 61.1 | 61.1 |
| GPRK7   | 61.1 | 61.1 |
| MAST3   | 61.1 | 61.1 |
| MAST4   | 61.1 | 61.1 |
| MAST2   | 61.1 | 61.1 |
| MAST1   | 61.1 | 61.1 |
| RSK1    | 58.3 | 61.1 |
| PKCz    | 58.3 | 58.3 |
| GPRK6   | 58.3 | 58.3 |
| GPRK5   | 58.3 | 58.3 |
| GPRK4   | 58.3 | 58.3 |
| PDK1    | 55.6 | 58.3 |
| BARK2   | 55.6 | 55.6 |
| BARK1   | 55.6 | 55.6 |
| PKG1    | 55.6 | 52.8 |
| p70S6K  | 52.8 | 52.8 |
| PKG2    | 52.8 | 55.6 |
| p70S6Kb | 50.0 | 50.0 |
| SgK494  | 44.4 | 44.4 |
| RSKL2   | 27.8 | 27.8 |

**Supplementary Table 3. Target enzymes binding more potently than LATS1. Related to Figure 3.** Of 314 kinases in a binding panel, these enzymes bound 1  $\mu$ M TRULI more strongly than did Lats1 or Lats2. The assay did not test for functional inhibition. Green- PKA family members, Orange- PKC family members, Blue- NDR family members, Yellow- ROCK family members.

| <b>Kinase</b> | <b>Affinity</b> |
|---------------|-----------------|
| CLK4          | 102.191         |
| <b>PRKCQ</b>  | <b>99.155</b>   |
| CDC7          | 99.093          |
| DMPK          | 97.919          |
| CDC42BPA      | 97.161          |
| HIPK3         | 95.798          |
| HIPK2         | 94.205          |
| <b>PRKACB</b> | <b>92.922</b>   |
| CLK2          | 92.819          |
| GSK3B         | 92.698          |
| <b>PRKCH</b>  | <b>90.416</b>   |
| CDK19         | 90.205          |
| PKN2          | 89.660          |
| CDK8          | 88.778          |
| PRKX          | 88.131          |
| BMP2K         | 86.274          |
| HIPK1         | 86.064          |
| DYRK1A        | 85.826          |
| PASK          | 85.771          |
| <b>ROCK2</b>  | <b>84.111</b>   |
| CDC42BPG      | 83.657          |
| PAK4          | 83.440          |
| DYRK1B        | 81.514          |
| TGFBR2        | 81.311          |
| LRRK2         | 81.277          |
| <b>ROCK1</b>  | <b>79.232</b>   |
| PRKG2         | 79.109          |
| CLK1          | 78.062          |
| <b>PRKCD</b>  | <b>77.995</b>   |
| PKN1          | 77.735          |
| MAP4K4        | 77.535          |
| DAPK3         | 77.096          |
| TAOK1         | 76.404          |

|        |        |
|--------|--------|
| LATS2  | 74.882 |
| MAP3K7 | 74.047 |
| LATS1  | 73.903 |

**Supplementary Table 4. Half-maximal inhibitory concentrations ( $IC_{50}$ s) of TRULI for selected kinases. Related to Figure 3.** Green- PKA family members, Orange- PKC family members, Blue- NDR family members, Yellow- ROCK family members.

| Kinase     | $IC_{50}$ (nM) |
|------------|----------------|
| PKA        | 60             |
| PKCepsilon | 14             |
| ROCK1      | 88             |
| NDR1       | 1000           |
